# Supplementary material for: Isolating N400 as neural marker of vocal anger processing in 6–11-year old children
Source: PubMed Central journal article supplement — Dev Cogn Neurosci. 2011 Dec 7;2(2):268–76. doi: 10.1016/j.dcn.2011.11.007 (PMC6987668; doi:10.1016/j.dcn.2011.11.007), 2011-12-07
Supplement: mmc1.pdf [file mmc1.pdf]

## Supplementary Material

All stimuli consisted of a meaningless sound (the interjection 'ah') expressed in angry, happy and neutral tone of voice. These stimuli are validated through a double validation phase consisting of expert ratings and a large validation phase with 70 adult participants (see Maurage et al., 2007 for details). All stimuli are standardised as for duration and intensity. The above battery is found to have high mean intensity ratings ( $M= 5.5$ ,  $SD=.02$ ) for each emotion in a 1-7 point scale (Maurage et al., 2007). Stimuli were normalised and standardised with respect to acoustic properties (see section 2.2 and Table 1). In this study we used the following stimuli from the above battery: Angry (No 22° Ang22-O-W9), Happy (No 112°Ha16-O-W5) and Neutral (No 136° Ne13-O-W8). Stimuli are accessible from: [www.ledonline.it//NeuropsychologicalTrends/index.html](http://www.ledonline.it//NeuropsychologicalTrends/index.html)
